# Supplementary material for: miR-221 Alleviates the Ox-LDL-Induced Macrophage Inflammatory Response via the Inhibition of DNMT3b-Mediated NCoR Promoter Methylation
Source: Mediators Inflamm. 2019 Sep 3;2019:4530534. doi: 10.1155/2019/4530534 (PMC6745124; doi:10.1155/2019/4530534)
Supplement: Supplementary Materials — Supplementary Table 1: the sequence of PCR primer. Supplementary Figure 1: qPCR analyzed the expression of miR-221. THP-1 cells were transfected with DNMT3b siRNA and NC for 48 h and pretreated with PMA for 48 h. These cells were treated with ox-LDL for 24 h. ∗p < 0.05, vs. the NC group; ^p < 0.05, vs. the ox-LDL/NC h group. Supplementary Figure 2: qPCR analyzed the expression of miR-221. THP-1 cells were transfected with adv. HA-NCoR for 48 h and treated with PMA for 48 h. These cells were treated with ox-LDL for 24 h. ∗p < 0.05, vs. the MOCK group; ^p < 0.05, vs. the ox-LDL/NC h group. [file 4530534.f1.docx]

**miR-221 alleviates the ox-LDL-induced macrophage inflammatory response via the inhibition of DNMT3b-mediated NCoR promoter methylation**

Jinshan Ye1,2#,Yaxi Wu3#, Ruiwei Guo1, Wenjun Zeng2, Yanan Duan2, Zhihua Yang2, Lixia Yang§1

1Department of Cardiology, 920th Hospital of PLA Joint Logistic Support Force, Yunnan 650032, China.

2Department of Cardiology, TongRen Hospital, Yunnan 650032, China.

3Institution of Cardiovascular Research, Xinqiao Hospital, Third Military Medical University, Chongqing, 400037, China.

*Corresponding author

Lixia Yang: Tel., 13808724098; Email: doctorylixia@aliyun.com

#These authors contributed equally to this work

Supplement Table 1. The sequnce of PCR primer

| Gene | Forward primer | Reverse primer |
| --- | --- | --- |
| MiR-221 | 5′-GTTGGTGGGAGCTACATTGTCTGC -3’ | 5′-GTGTCGTGGACTCGGCAATTC-3′ |
| U6 | 5′-ATTGGAACGATACAGAGAAGATT-3’ | 5′-GGAACGCTTCACGAATTTG-3′ |
| NCoR | 5′-ACACCGCAGTATTGTCCAAAT-3’ | 5′-CACCTGGTTTGTCTTGATGTTCT-3′ |
| IL-6 | 5′-ACTCACCTCTTCAGAACGAATTG-3’ | 5′-CCATCTTTGGAAGGTTCAGGTTG-3′ |
| TNF-α | 5′-CCTCTCTCTAATCAGCCCTCTG-3’ | 5′-GAGGACCTGGGAGTAGATGAG-3′ |
| Methylation NCoR | 5′-TTTTTTAAGTGTTGGGATTATAAGC-3’ | 5′-ACCTCACCCTACTAAAAAAACGAC-3’ |
| UNMethylation NCoR | 5′-TTTTAAGTGTTGGGATTATAAGTGT-3’ | 5′-AACCTCACCCTACTAAAAAAACAAC-3’ |


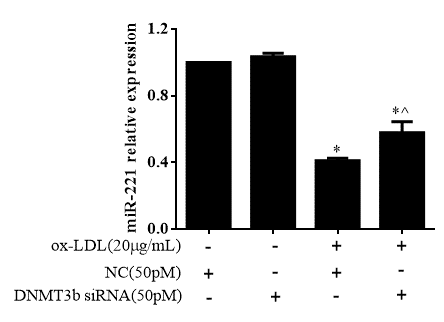


sFigure 1. qPCR analyzed the expression of miR-221. THP-1 cells were transfected with DNMT3b siRNA and NC for 48 h and pretreated with PMA for 48 h. These cells were treated with ox-LDL for 24 h. **p*<0.05, vs NC group; ^ *p*<0.05, vs ox-LDL/NC h group


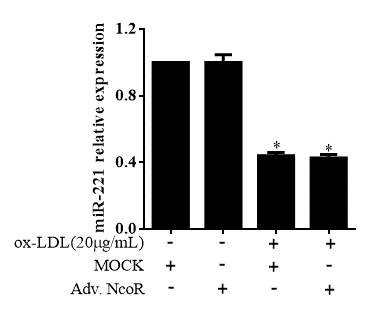


sFigure 2. qPCR analyzed the expression of miR-221. THP-1 cells were transfected with adv. HA-NCoR for 48 h and treated with PMA for 48 h. These cells were treated with ox-LDL for 24 h. **p*<0.05, vs MOCK group; ^ *p*<0.05, vs ox-LDL/NC h group
